# Supplementary material
Source: PubMed Central journal article supplement (PMC10645563)
Supplement: mmc1.pdf [file mmc1.pdf]

**Supplemental information**

**Prospective, multi-site study of healthcare  
utilization after actionable monogenic  
findings from clinical sequencing**

**Jodell E. Linder, Ran Tao, Wendy K. Chung, Krzysztof Kiryluk, Cong Liu, Chunhua Weng, John J. Connolly, Hakon Hakonarson, Margaret Harr, Kathleen A. Leppig, Gail P. Jarvik, David L. Veenstra, Sharon Aufox, Rex L. Chisholm, Adam S. Gordon, Christin Hoell, Laura J. Rasmussen-Torvik, Maureen E. Smith, Ingrid A. Holm, Erin M. Miller, Cynthia A. Prows, Omar Elskeally, Iftikhar J. Kullo, Christopher Lee, Sheethal Jose, Teri A. Manolio, Robb Rowley, Nana Addo Padi-Adjirackor, Ni Ketut Wilmayani, Brittany City, Wei-Qi Wei, Georgia L. Wiesner, Alanna Kulchak Rahm, Janet L. Williams, Marc S. Williams, and Josh F. Peterson**

## **Table of Contents: Supplemental Information**

- [Supplemental Materials and Methods](#): HI-TAG generation
- [Table S1](#): HI-TAG database.
- [Table S2](#): Post return guidelines.
- [Table S3](#): Genes associated with conditions of interest.
- [Table S4](#): Demographics of participants.
- [Table S5](#): Frequency of health care costs.
- [Table S6](#): Costs differences between participants.
- [Figure S1](#): Accuracy of utilizing CPT codes to assess outcomes compared to manual chart review.
- [Figure S2](#): Differences in frequency of health care utilization in participants before and after return of results.
- [References](#)

## **Supplemental Materials and Methods**

### **Supplemental Methods:**

#### *Chart review methods*

During the study, process and clinical outcomes were abstracted after manual review of individuals' electronic health records. Manual review was limited to participants who received P/LP results and was conducted at six and 12 months post return. Abstracted test types were based on standard clinical guidelines for care after the return of results (RoR) of P/LP findings. The network entered de-identified outcome data into REDCap projects housed at the coordinating center. To ensure consistency across the network, abstraction guides were developed by condition leads to assist coordinators in pulling and entering data. Training and review of questions were discussed on workgroup calls and abstraction guides were updated accordingly to assist with uniform data collection across all 10 sites.

#### *High-throughput assessment*

The HI-TAG knowledge base contains 321 unique CPT codes that were categorized into 73 code clusters (services) each representing a single type of test or procedure (# clusters/condition): arrhythmia (18); BCa (18), cardiomyopathy (26), CRC (8), FH (3). The knowledge base was generated by gathering lists of commonly utilized CPT codes for the five conditions from site physician condition experts and online look up tools such as the American Medical Association and American Academy of Professional Codes. CPT code sets were manually grouped into categories based on similarity, and frequency counts were generated to verify utilization within at least one center. The analyses presented in this paper include all process outcome related CPT codes listed in HI-TAG unless otherwise noted.

#### *Validation of HI-TAG*

HI-TAG services were compared to manual chart review conducted during the study. In some cases, multiple HI-TAG services were linked to one chart review variable as the CPT data were more granular than the study assessments. CPT data were truncated to 12-month post return and compared to results from chart review. To avoid underpowered comparisons, validation of HI-TAG was conducted only on test types that exceeded 10 observations.

For events where there was disagreement between the HI-TAG method and the chart review, a secondary chart review at three centers (Vanderbilt University Medical Center, Columbia, and Northwestern) was conducted to adjudicate conflicting results. Analysis was conducted on a per participant basis and positive predictive value (PPV) and sensitivity are reported along with 95%

confidence intervals for each group of CPTs based on the adjudicated reference standard (**Figure S1**). Average sensitivity ranged from 0.55 to 0.84 [Arrhythmia (0.75); BCa (0.76), Cardiomyopathy (0.84), CRC (0.55), FH (0.71)] and PPV ranged from 0.64 to 0.90 [Arrhythmia (0.87); BCa (0.81), Cardiomyopathy (0.90), CRC (0.90), FH (0.64)].

**Table S1. HI-TAG database.** See accompanying excel document. First tab displays a summary of services examined for each condition including counts of CPT code types included in a given service and how many codes were considered primarily evaluation screening. Subsequent tabs list the codes and descriptions for each condition and service.

| <b>Condition</b>                           | <b>Guideline</b>            | <b>Recommended surveillance testing</b>          | <b>Adult age range</b> |
|--------------------------------------------|-----------------------------|--------------------------------------------------|------------------------|
| Arrhythmia                                 | AHA 2023 <sup>1</sup>       | Electrocardiogram, rhythm surveillance (various) | 40+                    |
| Cardiomyopathy                             | AHA & ACC 2020 <sup>2</sup> | Echocardiography (primary), Cardiac MRI          | 40+                    |
| Familial Hypercholesterolemia              | Various <sup>3</sup>        | Lipid profile, Lipoprotein (a) one time          | 18+                    |
| Hereditary Breast and Ovarian Cancer (BCa) | NCCN 2021 <sup>4</sup>      | Mammogram (with tomosynthesis), Breast MRI       | 25-75                  |
| Lynch Syndrome (CRC)                       | NCCN 2021 <sup>5</sup>      | Colonoscopy every 1-2 years at age 25            | 25-75                  |

**Table S2.** Post return guideline-based testing and age ranges. BCa: Breast Cancer, CRC: Colorectal Cancer.

| Arrhythmia     |        | Breast cancer |        | Cardiomyopathy |        | Colorectal cancer |        | FH           |        |
|----------------|--------|---------------|--------|----------------|--------|-------------------|--------|--------------|--------|
| Gene           | OMIM   | Gene          | OMIM   | Gene           | OMIM   | Gene              | OMIM   | Gene         | OMIM   |
| <i>CACNA1A</i> | 601011 | <i>ATM</i>    | 607585 | <i>ACTC1</i>   | 613424 | <i>APC</i>        | 611731 | <i>APOB</i>  | 107730 |
| <i>KCNE1</i>   | 613695 | <i>BRCA1</i>  | 604370 | <i>DSC2</i>    | 125645 | <i>BMPR1A</i>     | 174900 | <i>APOE</i>  | 617347 |
| <i>KCNE2</i>   | 613693 | <i>BRCA2</i>  | 114480 | <i>DSG2</i>    | 612877 | <i>JAK2</i>       | 147796 | <i>LDLR</i>  | 605747 |
| <i>KCNH2</i>   | 613688 | <i>CHEK2</i>  | 114480 | <i>DSP</i>     | 605676 | <i>MLH1</i>       | 609310 | <i>PCSK9</i> | 607786 |
| <i>KCNQ1</i>   | 607542 | <i>JAK2</i>   | 147796 | <i>GLA</i>     | 301500 | <i>MSH2</i>       | 120435 |              |        |
| <i>LMNA</i>    | 150330 | <i>PALB2</i>  | 620442 | <i>HFE</i>     | 613609 | <i>MSH6</i>       | 614350 |              |        |
| <i>RYR2</i>    | 115000 | <i>PTEN</i>   | 601728 | <i>LMNA</i>    | 115200 | <i>MUTYH</i>      | 604933 |              |        |
| <i>SCN5A</i>   | 603830 | <i>TP53</i>   | 191170 | <i>MYBPC3</i>  | 615396 | <i>POLE</i>       | 615083 |              |        |
|                |        |               |        | <i>MYH7</i>    | 613426 | <i>PTEN</i>       | 158350 |              |        |
|                |        |               |        | <i>MYL2</i>    | 608758 | <i>SMAD4</i>      | 174900 |              |        |
|                |        |               |        | <i>MYL3</i>    | 608751 | <i>STK11</i>      | 175200 |              |        |
|                |        |               |        | <i>PKP2</i>    | 602861 | <i>PMS2</i>       | 600259 |              |        |
|                |        |               |        | <i>PRKAG2</i>  | 600858 |                   |        |              |        |
|                |        |               |        | <i>TMEM43</i>  | 612048 |                   |        |              |        |
|                |        |               |        | <i>TNNI3</i>   | 613286 |                   |        |              |        |
|                |        |               |        | <i>TNNT2</i>   | 601494 |                   |        |              |        |
|                |        |               |        | <i>TPM1</i>    | 611878 |                   |        |              |        |

**Table S3.** Gene and OMIM numbers associated with conditions examined. Individuals with P/LP findings in the below genes were grouped by condition for analysis. FH: Familial Hypercholesterolemia.

|                             | Arrhythmia |     | BCa  |     | Cardiomyopathy |     | CRC  |     | FH   |     |
|-----------------------------|------------|-----|------|-----|----------------|-----|------|-----|------|-----|
| <b>Total</b>                | 95         |     | 96   |     | 95             |     | 105  |     | 86   |     |
| Female                      | 55         |     | 96   |     | 58             |     | 66   |     | 54   |     |
| Male                        | 40         |     | 0    |     | 37             |     | 39   |     | 32   |     |
| <b>Age</b>                  |            |     |      |     |                |     |      |     |      |     |
| <40                         | 11         |     | 12   |     | 21             |     | 25   |     | 17   |     |
| 40-75                       | 68         |     | 56   |     | 62             |     | 61   |     | 56   |     |
| >75                         | 16         |     | 12   |     | 12             |     | 19   |     | 13   |     |
| <b>Race &amp; Ethnicity</b> | P/LP       | Neg | P/LP | Neg | P/LP           | Neg | P/LP | Neg | P/LP | Neg |
| White                       | 93         | 84  | 86   | 86  | 84             | 81  | 101  | 94  | 81   | 78  |
| Black                       | 2          | 11  | 6    | 7   | 7              | 12  | 2    | 6   | 4    | 6   |
| Asian                       | 0          | 0   | 1    | 0   | 2              | 1   | 0    | 1   | 0    | 2   |
| Other/unknown               | 0          | 0   | 3    | 3   | 2              | 1   | 2    | 4   | 1    | 0   |
| Hispanic                    | 0          | 2   | 5    | 3   | 4              | 2   | 3    | 7   | 1    | 2   |
| Non-Hispanic                | 94         | 93  | 89   | 90  | 91             | 92  | 100  | 95  | 85   | 84  |
| Unknown                     | 1          | 0   | 2    | 3   | 0              | 1   | 2    | 3   | 0    | 0   |

**Table S4.** Participants with Pathogenic or Likely Pathogenic (P/LP) findings and those with no P/LP variants (Neg: negative reports) stratified by demographics. BCa: breast cancer; CRC: colorectal cancer; FH: familial hypercholesterolemia.



| Condition                     | P/LP Pre-RoR | P/LP Post-RoR | Neg Pre-RoR | Neg Post-RoR | Difference in difference |
|-------------------------------|--------------|---------------|-------------|--------------|--------------------------|
| Arrhythmia                    | 0 (0, 1)     | 1 (0, 3)      | 0 (0, 2)    | 0 (0, 1)     | 1 (0, 3.5)               |
| Breast Cancer                 | 0 (0, 0)     | 0 (0, 1)      | 0 (0, 0)    | 0 (0, 0)     | 0 (0, 1)                 |
| Cardiomyopathy                | 0 (0, 2)     | 2 (0, 4)      | 0 (0, 0)    | 0 (0, 2)     | 1 (-2, 3)                |
| Colorectal cancer             | 0 (0, 0)     | 0 (0, 0)      | 0 (0, 0)    | 0 (0, 0)     | 0 (0, 1)                 |
| Familial hypercholesterolemia | 0 (0, 1)     | 0 (0, 1.8)    | 0 (0, 1)    | 0 (0, 1)     | 0 (-1, 1)                |

**Table S5. Frequency of health care tests or procedures over one year.** Results are presented stratified by condition comparing test counts over one year period prior to return of results (Pre-RoR) and after return of results (Post-RoR) among the individuals receiving pathogenic/likely pathogenic (P/LP) and those receiving negative (Neg) reports. A difference in difference analysis compares the change in P/LP associated healthcare utilization over time to the change associated with negative report return. Values are median rates with interquartile range.

| Condition                     | P/LP Pre-RoR | P/LP Post-RoR    | Neg Pre-RoR  | Neg Post-RoR | Difference in difference |
|-------------------------------|--------------|------------------|--------------|--------------|--------------------------|
| Arrhythmia                    | 0 (0, 25.9)  | 136.7 (0, 456.0) | 0 (0, 156.2) | 0 (0, 25.9)  | 0 (0, 456.0)             |
| Breast Cancer                 | 0 (0, 0)     | 0 (0, 186.1)     | 0 (0, 0)     | 0 (0, 0)     | 0 (0, 149.0)             |
| Cardiomyopathy                | 0 (0, 303.8) | 304.4 (0, 740.1) | 0 (0, 0)     | 0 (0, 151.6) | 182.7 (0, 691.4)         |
| Colorectal cancer             | 0 (0, 0)     | 0 (0, 0)         | 0 (0, 0)     | 0 (0, 0)     | 0 (0, 4.1)               |
| Familial hypercholesterolemia | 0 (0, 11.6)  | 0 (0, 18.7)      | 0 (0, 11.6)  | 0 (0, 11.6)  | 0 (0, 11.3)              |

**Table S6. Cost differences between participants receiving P/LP and negative reports.**

Results are presented stratified by condition comparing costs prior to return of results (Pre-RoR) and after return of results (Post-RoR) among the individuals receiving pathogenic/likely pathogenic (P/LP) and those receiving negative (Neg) reports. A difference in difference analysis compares the change in P/LP report rates over time to the change in negative report rates over time. Values are median rates per year with interquartile range and given in dollars.

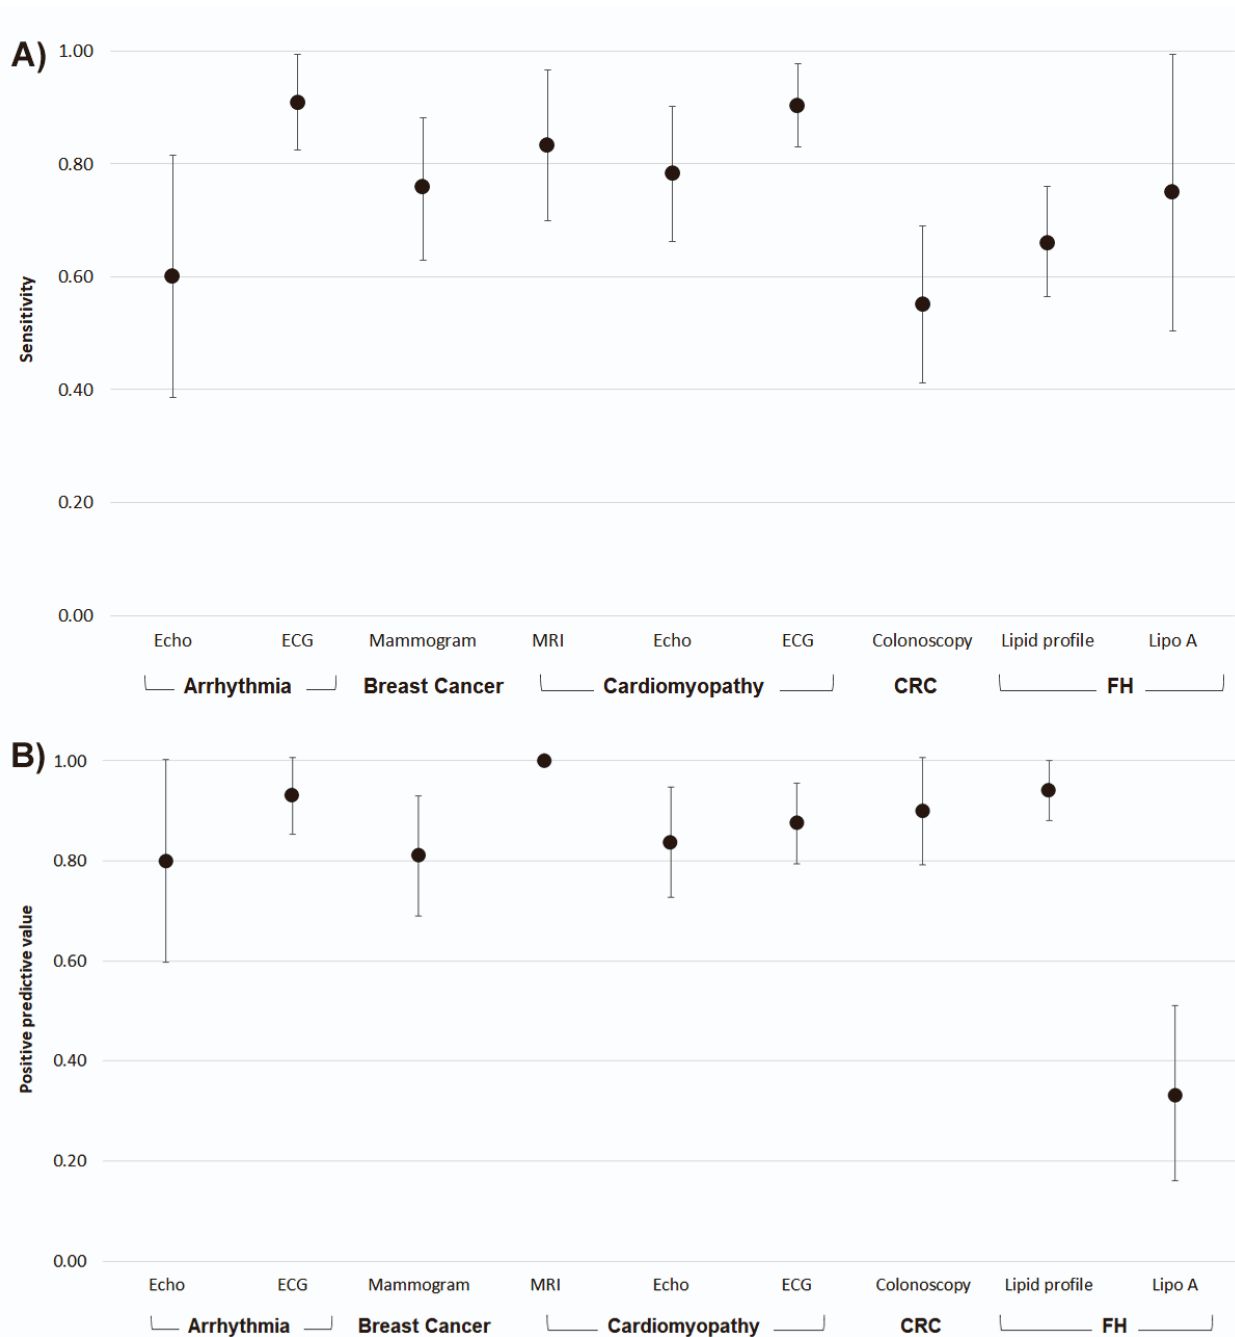

**Figure S1. Accuracy of utilizing CPT codes to assess outcomes compared to manual chart review.** A) Sensitivity and B) positive predictive value when comparing HI-TAG CPT codes to manual abstraction for tests with >10 instances. Bars represent 95% confidence intervals. CRC: Colorectal cancer; FH: familial hypercholesterolemia, ECG: electrocardiogram, MRI: magnetic resonance imaging, Echo: Echocardiogram.

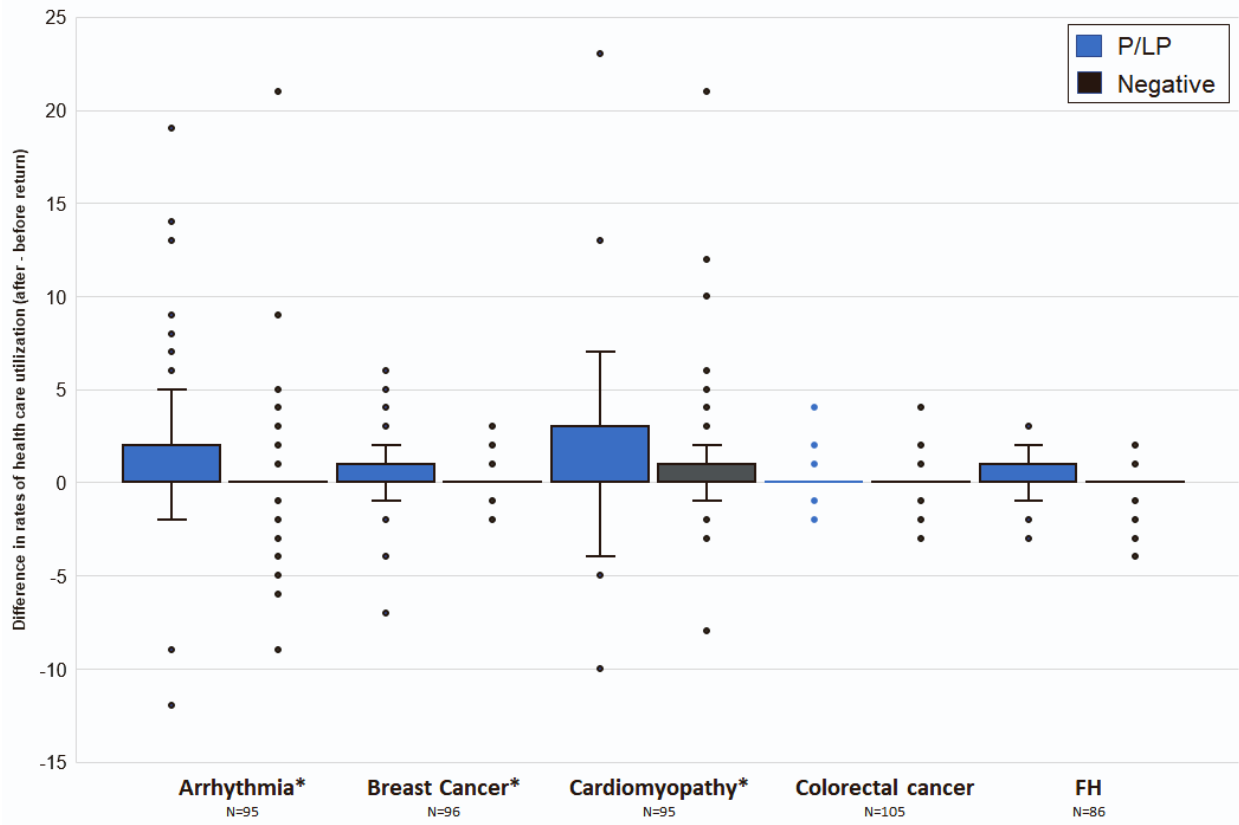

**Figure S2. Differences in frequency of health care utilization in participants before and after return of results.** When the change in services among participants with P/LP results were compared to those without a variant, there were significantly higher rates in the P/LP group for three (arrhythmia  $p < 0.0001$ , breast cancer  $p = 0.006$ , cardiomyopathy  $p = 0.038$ ) a marginally significant difference in colorectal cancer ( $p = 0.052$ ) and a non-significant difference for FH ( $p > 0.05$ ) at one year post return. Box represents interquartile range (IQR), with whiskers representing variability outside the quartiles, and outliers represented as dots. Data shown limited to 5 to 95 percentiles of rates. IQR for colorectal cancer and FH are 0. FH: familial hypercholesterolemia, \* indicates  $p < 0.05$ .

## References

1. Landstrom AP, Chahal AA, Ackerman MJ, et al. Interpreting Incidentally Identified Variants in Genes Associated With Heritable Cardiovascular Disease: A Scientific Statement From the American Heart Association. *Circ Genomic Precis Med.* 2023;16(2):e000092. doi:10.1161/HCG.0000000000000092
2. Ommen SR, Mital S, Burke MA, et al. 2020 AHA/ACC Guideline for the Diagnosis and Treatment of Patients With Hypertrophic Cardiomyopathy. *Circulation.* 2020;142(25):e558-e631. doi:10.1161/CIR.0000000000000937
3. Grundy SM, Stone NJ, Bailey AL, et al. 2018 AHA/ACC/AACVPR/AAPA/ABC/ACPM/ADA/AGS/APhA/ASPC/NLA/PCNA Guideline on the Management of Blood Cholesterol: A Report of the American College of Cardiology/American Heart Association Task Force on Clinical Practice Guidelines. *Circulation.* 2019;139(25):e1082-e1143. doi:10.1161/CIR.0000000000000625
4. Daly MB, Pilarski R, Yurgelun MB, et al. NCCN Guidelines Insights: Genetic/Familial High-Risk Assessment: Breast, Ovarian, and Pancreatic, Version 1.2020: Featured Updates to the NCCN Guidelines. *J Natl Compr Canc Netw.* 2020;18(4):380-391. doi:10.6004/jnccn.2020.0017
5. Weiss JM, Gupta S, Burke CA, et al. NCCN Guidelines® Insights: Genetic/Familial High-Risk Assessment: Colorectal, Version 1.2021. *J Natl Compr Cancer Netw JNCCN.* 2021;19(10):1122-1132. doi:10.1164/jnccn.2021.0048
